# Supplementary material
Source: publisher figshare collection journal article supplement (https://acs.figshare.com/ndownloader/files/16926851)
Supplement: Supplementary file 1 [file 16926851]

## Supporting Information

### Pea Protein/Gold Nanocluster/Indocyanine Green Ternary Hybrid for Near-Infrared Fluorescence/Computed Tomography Dual-Modal Imaging and Synergistic Photodynamic/Photothermal Therapy

Mi Wu<sup>#</sup>, Zhao Li<sup>#</sup>, Jinrong Yao, Zhengzhong Shao, Xin Chen<sup>\*</sup>

*State Key Laboratory of Molecular Engineering of Polymers, Department of Macromolecular Science, Laboratory of Advanced Materials, Fudan University, Shanghai 200433, P. R. China.*

*<sup>\*</sup> E-mail: chenx@fudan.edu.cn*

*<sup>#</sup> M. Wu and Z. Li contributed equally to this work.*

Number of pages: 4

Number of figures: 4

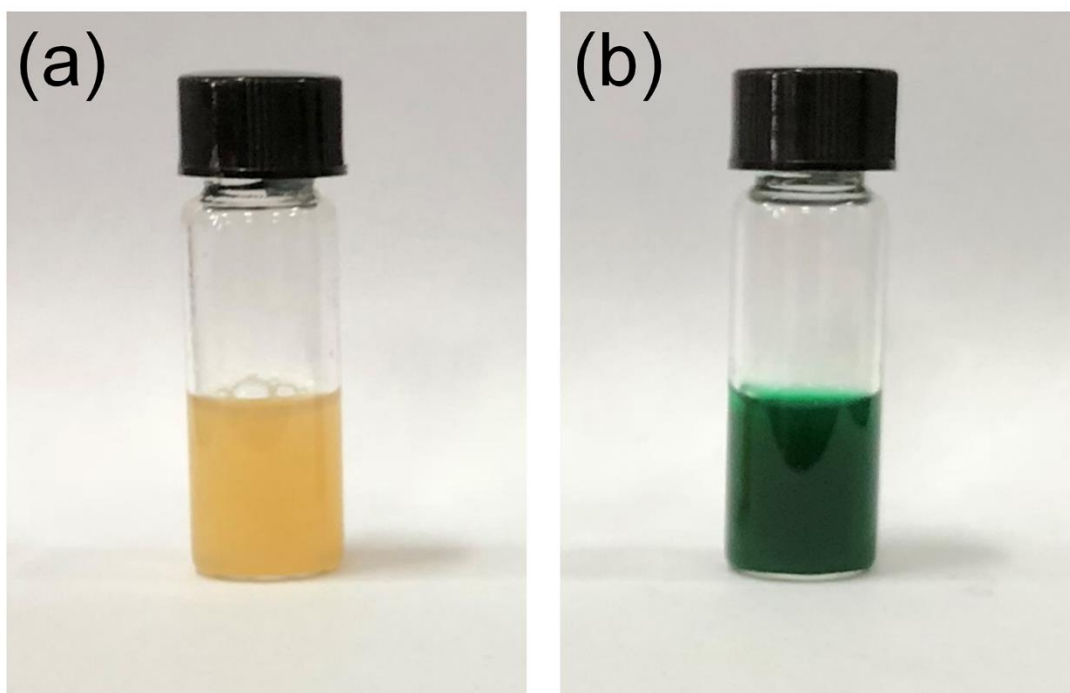

**Figure S1.** Images of (a) AuNCs/PPI NPs and AuNCs/PPI-ICG nanohybrid solutions.

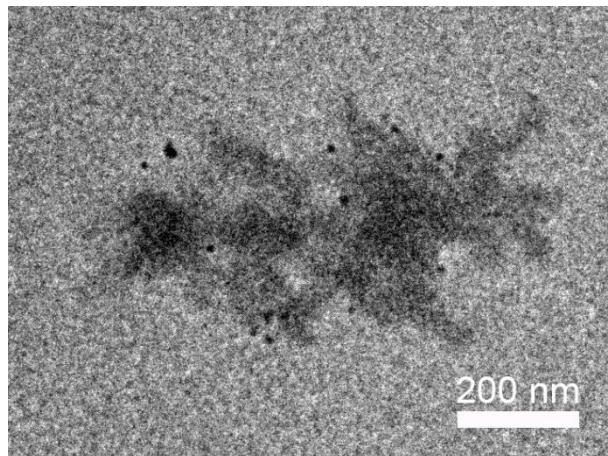

**Figure S2.** TEM image of AuNCs/PPI-ICG nanohybrid.

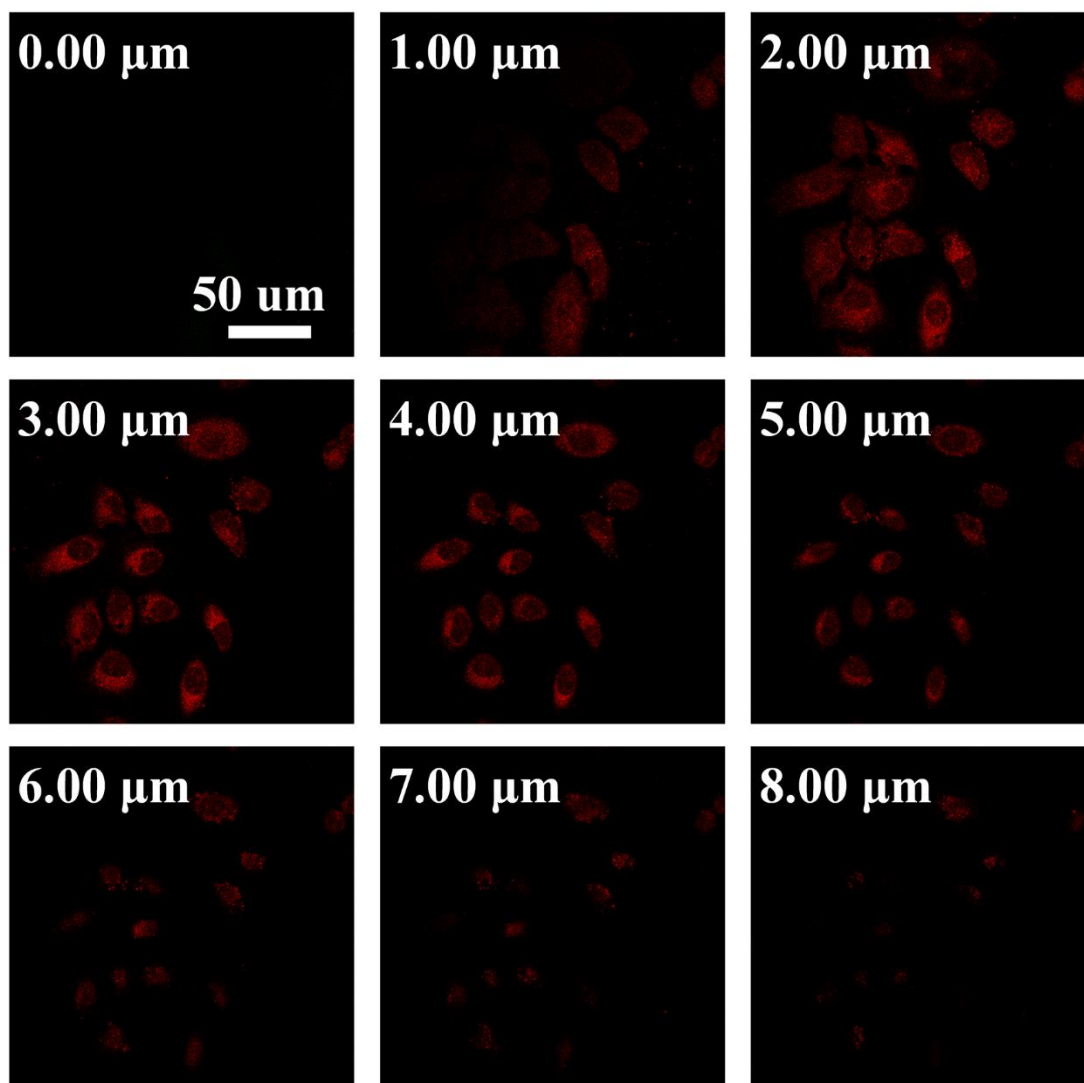

**Figure S3.** A series of 9-step z-stack confocal fluorescence images of A549 cells incubated with AuNCs/PPI-ICG nanohybrid (ICG concentration: 20  $\mu\text{g/mL}$ ) for 4 h (step = 1  $\mu\text{m}$ , ICG channel only).

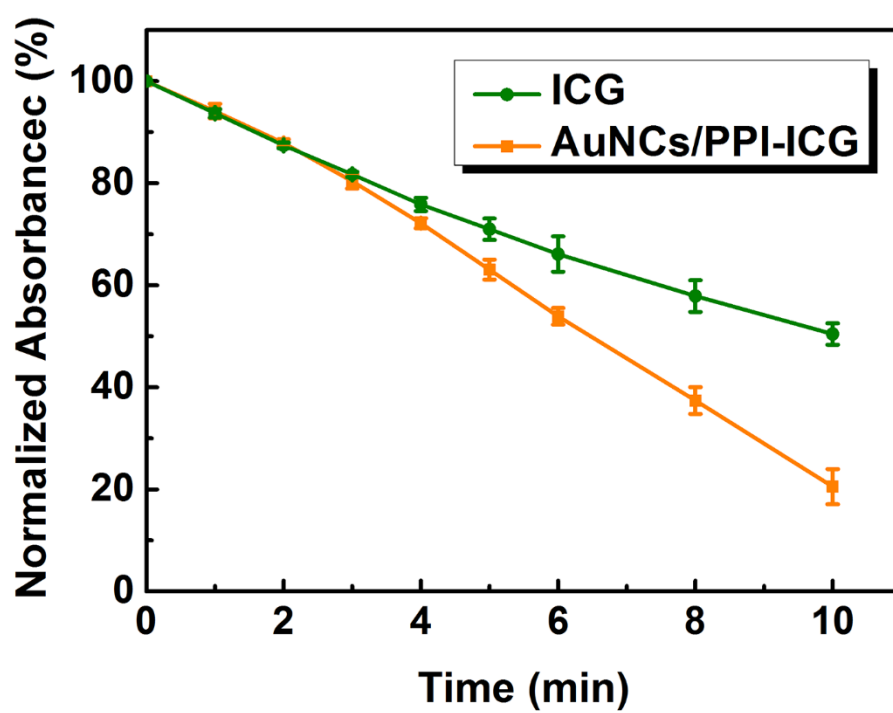

**Figure S4.** The decrease of ICG absorbance of AuNCs/PPI-ICG nanohybrid and pure ICG using 808 nm NIR laser irradiation ( $1 \text{ W/cm}^2$ ).
